# Supplementary material
Source: PubMed Central journal article supplement (PMC1626144)
Supplement: JCI0628953sd.pdf [file JCI0628953sd.pdf]

**Supplemental Table 1: Summary of phenotypes found in the mouse models for SMS and dup (17)(p11.2p11.2) syndromes.**

Phenotypes observed in mouse models for SMS and dup (17)(p11.2p11.2) syndromes are listed in the table. *Df(11)17/+*: mice containing a deletion of the SMS syntenic region. *Rai1+/-*: mice carrying a null allele of *Rai1*. *Dp(11)17/+*: mice containing a duplication of the SMS syntenic region. Locomotor activity was measured in the open field assay. Anxiety levels were determined in the open field test or in the light-dark test. The learning and memory phenotypes were studied with the fear conditioned paradigm. ND: not determined.

| <b>Genotype<br/>Phenotype</b>        | <i>Df(11)17/+</i>                  | <i>Dp(11)17/+</i> | <i>Dp(11)17/Df(11)17</i> | <i>Rai1+/-</i> | <i>Dp(11)17/Rai1-</i> |
|--------------------------------------|------------------------------------|-------------------|--------------------------|----------------|-----------------------|
| <b>Physical features</b>             |                                    |                   |                          |                |                       |
| Craniofacial anomalies               | yes (100%)                         | no                | no                       | yes (~18%)     | no                    |
| Body weight                          | obesity                            | underweight       | normal                   | obesity        | normal                |
| Reduced male fertility               | yes (genetic background dependent) | no                | no                       | no             | no                    |
| <b>Neurobehavioral abnormalities</b> |                                    |                   |                          |                |                       |
| Overt seizures                       | yes (20%)                          | no                | no                       | yes (2%)       | no                    |
| Abnormal EEG                         | yes                                | no                | yes                      | ND             | ND                    |
| Abnormal circadian rhythm            | yes                                | no                | ND                       | ND             | ND                    |
| Locomotor activity                   | hypoactive                         | hyperactive       | hyperactive              | hypoactive     | hyperactive           |
| Anxiety                              | normal                             | elevated          | normal                   | ND             | normal                |
| Learning and memory                  | normal                             | impaired          | normal                   | normal         | normal                |
| Citation                             | 21, 22                             | 21, 22            | 21, present work         | 23             | present work          |

**Supplemental Table 2. Restoring genomic balance corrects several abnormal behaviors and learning deficits observed in chromosome engineered animal models.**

|                         |                            | <b>Wild type</b> | <i>Dp(11)17/+</i> | <i>Df(11)17/+</i> | <i>Dp(11)17/<br/>Df(11)17</i> |
|-------------------------|----------------------------|------------------|-------------------|-------------------|-------------------------------|
| <b>Open Field</b>       | N                          | 12               | 21                | 7                 | 10                            |
|                         | Total Distance (cm)        | 4523 +/- 551     | 6378 +/- 327      | 4716 +/- 498      | 6629 +/- 390                  |
|                         | Vertical Activity (number) | 499 +/- 60       | 305 +/- 22        | 590 +/- 41        | 641 +/- 42                    |
|                         | Center/Total Distance      | 0.33 +/- 0.04    | 0.26+/-0.01       | 0.33+/-0.01       | 0.33+/- 0.02                  |
| <b>Fear Conditioned</b> | % Freezing to context      | 36.0 +/- 6.5     | 12.6 +/- 2.5      | 32.8 +/- 8.5      | 36.6 +/- 5.0                  |
|                         | % Freezing to sound        | 51.0 +/- 8       | 60.2 +/- 3.5      | 46.0 +/- 11       | 59.4 +/- 4.5                  |

Average values for the different parameters measured in the open field test and the conditioned fear test are presented in the table.

**Supplemental Table 3. Normalizing *Rai1* gene dosage rescues several abnormal behaviors and learning and memory deficits of *Dp(11)17/+* mice.**

|                         |                            | <b>Wild type</b> | <b><i>Dp(11)17/+</i></b> | <b><i>Rai1</i><sup>+/-</sup></b> | <b><i>Dp(11)17/Rai1</i><sup>-</sup></b> |
|-------------------------|----------------------------|------------------|--------------------------|----------------------------------|-----------------------------------------|
| <b>Open Field</b>       | N                          | 21               | 18                       | 17                               | 21                                      |
|                         | Total Distance (cm)        | 3022 +/- 259     | 3945 +/- 260             | 2270 +/- 175                     | 3752 +/- 234                            |
|                         | Vertical Activity (number) | 282 +/- 24       | 195 +/- 27               | 374 +/- 40                       | 286 +/- 39                              |
|                         | Center/Total Distance      | 0.22 +/- 0.02    | 0.14 +/- 0.02            | 0.26 +/- 0.02                    | 0.19 +/- 0.02                           |
| <b>Fear Conditioned</b> | % Freezing to context      | 53.6 +/- 5.5     | 25.7 +/- 4.5             | 55.7 +/- 5.4                     | 40.9 +/- 5.2                            |
|                         | % Freezing to sound        | 60.3 +/- 4.5     | 72.8 +/- 3.9             | 48.4 +/- 5.2                     | 73.3 +/- 4.0                            |

Average values for the different parameters measured in the open field test and the conditioned fear test are presented in the table.
